# Supplementary material for: MSEDDI: Multi-Scale Embedding for Predicting Drug—Drug Interaction Events
Source: MDPI journal article supplement (doi:10.3390/ijms24054500), 2023-02-24
Supplement: s1 [file s1]

# Supplementary Materials

## MSEDDI: Multi-Scale Embedding for Predicting Drug—Drug Interaction Events

Liyi Yu <sup>†</sup>, Zhaochun Xu <sup>†</sup>, Meiling Cheng, Weizhong Lin, Wangren Qiu <sup>\*</sup> and Xuan Xiao <sup>\*</sup>

Department of Computer, School of Information Engineering, Jingdezhen Ceramic University,  
Jingdezhen 333403, China

<sup>\*</sup> Correspondence: qiuone@163.com (W.Q.); jdzxiaoxuan@163.com (X.X.)

<sup>†</sup> These authors contributed equally to this work.

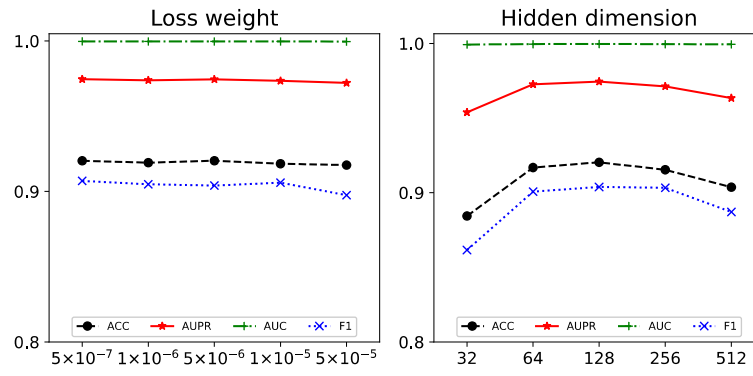

**Figure S1.** The metric scores under two hyperparameter settings on Database2.

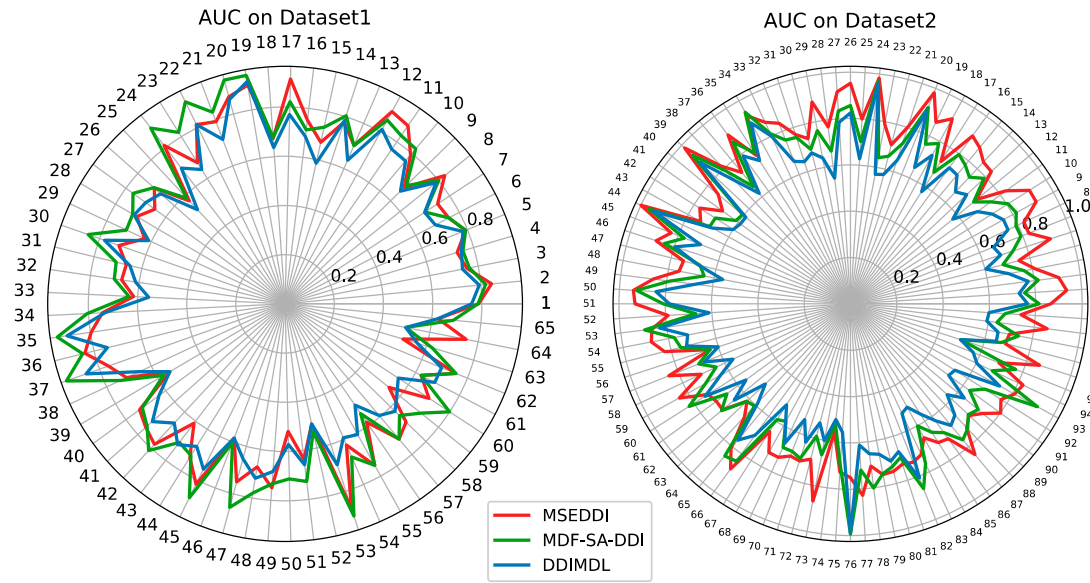

**Figure S2.** The AUC of partial baselines for each event.

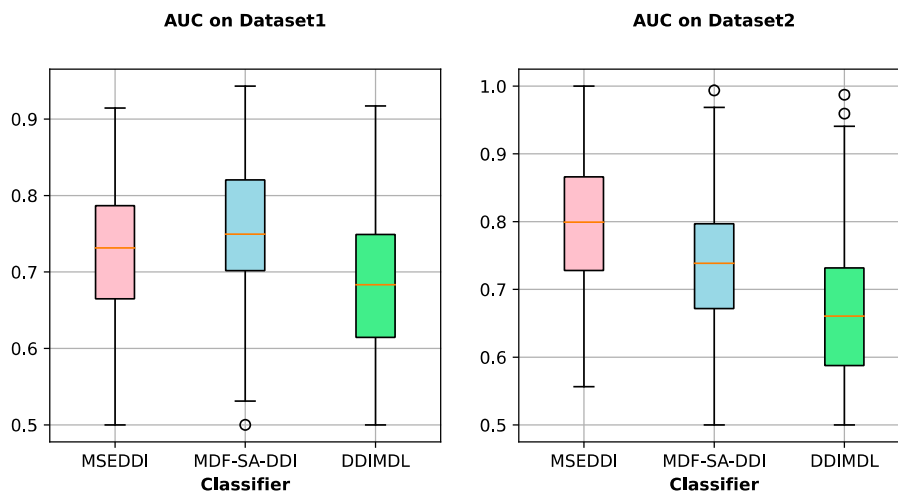

**Figure S3.** The statistics of AUC for partial baselines in all events.

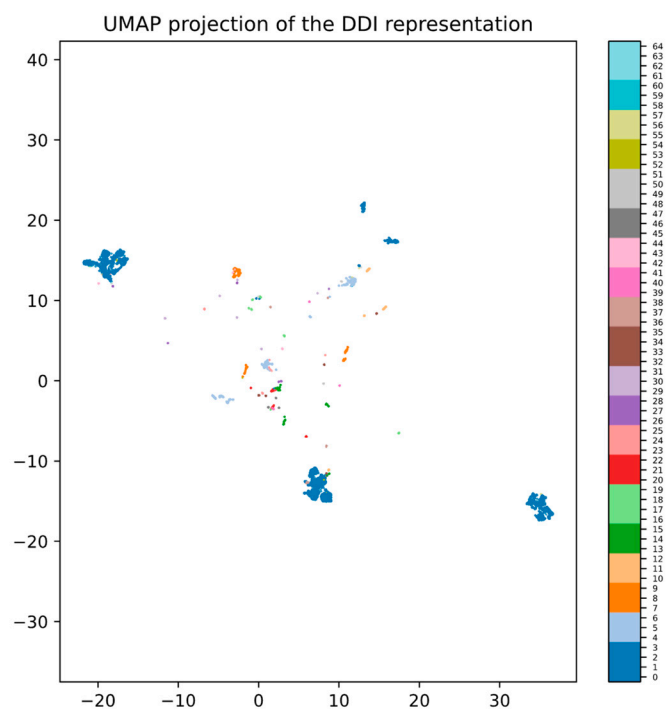

**Figure S4.** Low-dimensional visualization of drug pair representations through UMAP.

**Table S1.** The specific hyperparameter settings of MSED DI on Database1

| Hyperparameter   |      | ACC    | AUPR   | AUC    | F1     |
|------------------|------|--------|--------|--------|--------|
| Weight decay     | 1e-6 | 0.8834 | 0.9513 | 0.9988 | 0.7539 |
|                  | 5e-6 | 0.8845 | 0.9506 | 0.9987 | 0.7345 |
|                  | 1e-5 | 0.8843 | 0.9519 | 0.9988 | 0.7535 |
|                  | 5e-5 | 0.8842 | 0.9519 | 0.9987 | 0.7433 |
|                  | 1e-4 | 0.8894 | 0.9556 | 0.9988 | 0.7244 |
| Dropout          | 0.05 | 0.8603 | 0.9326 | 0.9982 | 0.6781 |
|                  | 0.1  | 0.8815 | 0.9479 | 0.9986 | 0.7485 |
|                  | 0.2  | 0.8843 | 0.9519 | 0.9988 | 0.7535 |
|                  | 0.3  | 0.8730 | 0.9442 | 0.9986 | 0.7126 |
|                  | 0.4  | 0.8384 | 0.9173 | 0.9979 | 0.6459 |
| Learning rate    | 1e-5 | 0.7659 | 0.8392 | 0.9941 | 0.3788 |
|                  | 5e-5 | 0.8671 | 0.9394 | 0.9984 | 0.7027 |
|                  | 1e-4 | 0.8843 | 0.9519 | 0.9988 | 0.7535 |
|                  | 5e-4 | 0.8733 | 0.9442 | 0.9986 | 0.7472 |
|                  | 1e-3 | 0.8689 | 0.9394 | 0.9984 | 0.7181 |
| Hidden dimension | 16   | 0.8269 | 0.9052 | 0.9972 | 0.5253 |
|                  | 32   | 0.8673 | 0.9406 | 0.9984 | 0.7136 |
|                  | 64   | 0.8843 | 0.9519 | 0.9988 | 0.7535 |
|                  | 128  | 0.8753 | 0.9456 | 0.9986 | 0.7434 |
|                  | 256  | 0.8697 | 0.9390 | 0.9983 | 0.7740 |
| Epoch            | 250  | 0.8783 | 0.9491 | 0.9987 | 0.7597 |
|                  | 300  | 0.8828 | 0.9501 | 0.9987 | 0.7266 |
|                  | 350  | 0.8843 | 0.9519 | 0.9988 | 0.7535 |
|                  | 400  | 0.8853 | 0.9530 | 0.9988 | 0.7322 |
|                  | 450  | 0.8855 | 0.9525 | 0.9988 | 0.7347 |
| Batch size       | 64   | 0.8790 | 0.9486 | 0.9987 | 0.7629 |

|  |      |        |        |        |        |
|--|------|--------|--------|--------|--------|
|  | 512  | 0.8843 | 0.9519 | 0.9988 | 0.7535 |
|  | 1024 | 0.8793 | 0.9471 | 0.9986 | 0.7373 |
|  | 1536 | 0.8672 | 0.9396 | 0.9984 | 0.6840 |

**Table S2.** The specific hyperparameter settings of MSED DI on Database2

| Hyperparameter   |      | ACC    | AUPR   | AUC    | F1     |
|------------------|------|--------|--------|--------|--------|
| Weight decay     | 5e-7 | 0.9203 | 0.9745 | 0.9996 | 0.9070 |
|                  | 1e-6 | 0.9191 | 0.9739 | 0.9996 | 0.9048 |
|                  | 5e-6 | 0.9204 | 0.9744 | 0.9996 | 0.9039 |
|                  | 1e-5 | 0.9184 | 0.9735 | 0.9996 | 0.9058 |
|                  | 5e-5 | 0.9175 | 0.9721 | 0.9995 | 0.8975 |
| Hidden dimension | 32   | 0.8844 | 0.9539 | 0.9993 | 0.8616 |
|                  | 64   | 0.9168 | 0.9726 | 0.9996 | 0.9007 |
|                  | 128  | 0.9204 | 0.9744 | 0.9996 | 0.9039 |
|                  | 256  | 0.9154 | 0.9713 | 0.9996 | 0.9033 |
|                  | 512  | 0.9037 | 0.9634 | 0.9994 | 0.8871 |

**Table S3.** The original AUPR and AUC of partial baselines for each event on Database1

| Event | AUPR    |            |        | AUC     |            |        |
|-------|---------|------------|--------|---------|------------|--------|
|       | MSED DI | MDF-SA-DDI | DDIMDL | MSED DI | MDF-SA-DDI | DDIMDL |
| 0     | 0.7867  | 0.7844     | 0.7586 | 0.7264  | 0.7233     | 0.6857 |
| 1     | 0.8436  | 0.8196     | 0.7933 | 0.7722  | 0.7529     | 0.7210 |
| 2     | 0.7532  | 0.7632     | 0.7350 | 0.6251  | 0.6155     | 0.5883 |
| 3     | 0.7304  | 0.7546     | 0.7490 | 0.5927  | 0.5884     | 0.5506 |
| 4     | 0.7925  | 0.7926     | 0.7808 | 0.5735  | 0.6640     | 0.5605 |
| 5     | 0.7513  | 0.7524     | 0.6905 | 0.5740  | 0.5577     | 0.4323 |
| 6     | 0.7413  | 0.6808     | 0.6783 | 0.5678  | 0.4341     | 0.4239 |
| 7     | 0.8322  | 0.8015     | 0.7871 | 0.6823  | 0.6204     | 0.5648 |
| 8     | 0.6771  | 0.6888     | 0.6558 | 0.4640  | 0.4751     | 0.4379 |
| 9     | 0.7908  | 0.8243     | 0.7598 | 0.6384  | 0.7426     | 0.6064 |
| 10    | 0.8797  | 0.8310     | 0.7637 | 0.7342  | 0.6617     | 0.5909 |
| 11    | 0.8947  | 0.8550     | 0.8118 | 0.7129  | 0.6932     | 0.6602 |
| 12    | 0.7028  | 0.7011     | 0.6368 | 0.4878  | 0.4608     | 0.3321 |
| 13    | 0.7762  | 0.8038     | 0.7838 | 0.5934  | 0.7104     | 0.5573 |
| 14    | 0.6721  | 0.7350     | 0.5851 | 0.4060  | 0.4559     | 0.3007 |
| 15    | 0.7530  | 0.7124     | 0.6853 | 0.5424  | 0.5444     | 0.5447 |
| 16    | 0.9144  | 0.8220     | 0.7699 | 0.8240  | 0.7474     | 0.6439 |
| 17    | 0.6736  | 0.6777     | 0.6367 | 0.4139  | 0.4199     | 0.3364 |
| 18    | 0.9023  | 0.9424     | 0.9172 | 0.7658  | 0.7764     | 0.7796 |
| 19    | 0.8714  | 0.9425     | 0.8613 | 0.7429  | 0.9104     | 0.7443 |
| 20    | 0.7918  | 0.8329     | 0.7146 | 0.5696  | 0.7015     | 0.4464 |
| 21    | 0.8134  | 0.9155     | 0.8134 | 0.6105  | 0.8467     | 0.6039 |
| 22    | 0.6750  | 0.8203     | 0.6425 | 0.4795  | 0.7022     | 0.4026 |
| 23    | 0.8111  | 0.8996     | 0.6945 | 0.5979  | 0.7491     | 0.4956 |
| 24    | 0.5718  | 0.5858     | 0.5227 | 0.2014  | 0.1717     | 0.0957 |
| 25    | 0.7106  | 0.7124     | 0.6756 | 0.5116  | 0.3951     | 0.4979 |
| 26    | 0.6552  | 0.7644     | 0.7004 | 0.3391  | 0.6114     | 0.4621 |
| 27    | 0.7003  | 0.7188     | 0.7124 | 0.4326  | 0.4471     | 0.4092 |
| 28    | 0.6290  | 0.7120     | 0.6115 | 0.3506  | 0.5297     | 0.2606 |

|    |        |        |        |        |        |        |
|----|--------|--------|--------|--------|--------|--------|
| 29 | 0.7159 | 0.8488 | 0.7784 | 0.4418 | 0.6984 | 0.5382 |
| 30 | 0.6647 | 0.7074 | 0.6499 | 0.3916 | 0.5518 | 0.5077 |
| 31 | 0.6716 | 0.7017 | 0.6145 | 0.4474 | 0.5024 | 0.4208 |
| 32 | 0.6163 | 0.6355 | 0.5555 | 0.2813 | 0.3100 | 0.2835 |
| 33 | 0.7441 | 0.8058 | 0.7326 | 0.5609 | 0.6035 | 0.4803 |
| 34 | 0.7968 | 0.9361 | 0.8957 | 0.7226 | 0.9075 | 0.8136 |
| 35 | 0.8384 | 0.8474 | 0.7443 | 0.5976 | 0.7436 | 0.5833 |
| 36 | 0.7612 | 0.9430 | 0.8576 | 0.6268 | 0.8372 | 0.6670 |
| 37 | 0.7114 | 0.7381 | 0.6536 | 0.5232 | 0.5358 | 0.3612 |
| 38 | 0.5434 | 0.5733 | 0.5434 | 0.1221 | 0.2211 | 0.1158 |
| 39 | 0.7315 | 0.7177 | 0.6341 | 0.5244 | 0.4925 | 0.4895 |
| 40 | 0.7567 | 0.7494 | 0.7213 | 0.4667 | 0.4299 | 0.5662 |
| 41 | 0.7793 | 0.8142 | 0.6616 | 0.6674 | 0.7005 | 0.4516 |
| 42 | 0.6101 | 0.7081 | 0.7200 | 0.2937 | 0.4490 | 0.3740 |
| 43 | 0.7345 | 0.7257 | 0.6817 | 0.4504 | 0.5676 | 0.4822 |
| 44 | 0.8179 | 0.8786 | 0.7498 | 0.6142 | 0.7214 | 0.5503 |
| 45 | 0.5831 | 0.6021 | 0.5832 | 0.1836 | 0.2826 | 0.2427 |
| 46 | 0.7498 | 0.8571 | 0.6520 | 0.5116 | 0.7494 | 0.3858 |
| 47 | 0.6718 | 0.7793 | 0.7187 | 0.4615 | 0.5510 | 0.5106 |
| 48 | 0.7497 | 0.7332 | 0.6833 | 0.4168 | 0.5251 | 0.4585 |
| 49 | 0.5178 | 0.7115 | 0.5714 | 0.0598 | 0.5554 | 0.2939 |
| 50 | 0.6364 | 0.7272 | 0.6591 | 0.6365 | 0.5845 | 0.6592 |
| 51 | 0.4999 | 0.5312 | 0.4999 | 0.0001 | 0.1147 | 0.0001 |
| 52 | 0.8750 | 0.9062 | 0.6875 | 0.8750 | 0.8706 | 0.5626 |
| 53 | 0.6250 | 0.6785 | 0.5938 | 0.4584 | 0.3710 | 0.5939 |
| 54 | 0.7500 | 0.7500 | 0.6071 | 0.5682 | 0.6389 | 0.6072 |
| 55 | 0.5833 | 0.5416 | 0.5000 | 0.5834 | 0.1668 | 0.0001 |
| 56 | 0.7187 | 0.7187 | 0.5937 | 0.6077 | 0.4688 | 0.3439 |
| 57 | 0.6875 | 0.6500 | 0.6250 | 0.4875 | 0.5251 | 0.4584 |
| 58 | 0.5417 | 0.7083 | 0.5833 | 0.2918 | 0.5209 | 0.3334 |
| 59 | 0.7000 | 0.8000 | 0.5500 | 0.5334 | 0.8000 | 0.5501 |
| 60 | 0.6250 | 0.6250 | 0.6875 | 0.6251 | 0.3750 | 0.5625 |
| 61 | 0.7500 | 0.7500 | 0.6875 | 0.5357 | 0.5357 | 0.6875 |
| 62 | 0.5000 | 0.6250 | 0.5625 | 0.0001 | 0.3250 | 0.5626 |
| 63 | 0.7500 | 0.5000 | 0.5000 | 0.3750 | 0.0000 | 0.0000 |
| 64 | 0.6250 | 0.6875 | 0.6250 | 0.3251 | 0.6875 | 0.4584 |

**Table S4.** The original AUPR and AUC of partial baselines for each event on Database2

| Event | AUPR   |            |        | AUC    |            |        |
|-------|--------|------------|--------|--------|------------|--------|
|       | MSEDDI | MDF-SA-DDI | DDIMDL | MSEDDI | MDF-SA-DDI | DDIMDL |
| 0     | 0.831  | 0.768      | 0.7257 | 0.866  | 0.8147     | 0.7649 |
| 1     | 0.8687 | 0.6256     | 0.5891 | 0.9357 | 0.7541     | 0.7295 |
| 2     | 0.8153 | 0.6707     | 0.6113 | 0.9062 | 0.8176     | 0.7739 |
| 3     | 0.697  | 0.5963     | 0.5383 | 0.8116 | 0.7636     | 0.697  |
| 4     | 0.5887 | 0.4541     | 0.392  | 0.7509 | 0.6802     | 0.6036 |
| 5     | 0.8185 | 0.555      | 0.5135 | 0.9082 | 0.7378     | 0.6826 |
| 6     | 0.737  | 0.6        | 0.4936 | 0.8278 | 0.7923     | 0.6647 |
| 7     | 0.7135 | 0.6127     | 0.5834 | 0.8282 | 0.7894     | 0.7518 |
| 8     | 0.8216 | 0.673      | 0.6226 | 0.9157 | 0.8173     | 0.7539 |

|    |        |        |        |        |        |        |
|----|--------|--------|--------|--------|--------|--------|
| 9  | 0.8194 | 0.6558 | 0.5775 | 0.9152 | 0.8062 | 0.7244 |
| 10 | 0.7272 | 0.5118 | 0.4396 | 0.8297 | 0.7492 | 0.6778 |
| 11 | 0.5395 | 0.4769 | 0.3433 | 0.7054 | 0.6896 | 0.5735 |
| 12 | 0.7398 | 0.6697 | 0.5873 | 0.8341 | 0.7916 | 0.6887 |
| 13 | 0.6845 | 0.5388 | 0.4533 | 0.8389 | 0.7504 | 0.663  |
| 14 | 0.7931 | 0.6482 | 0.5856 | 0.8752 | 0.7771 | 0.7218 |
| 15 | 0.8006 | 0.6369 | 0.5614 | 0.8964 | 0.797  | 0.7259 |
| 16 | 0.5431 | 0.3327 | 0.364  | 0.7278 | 0.6718 | 0.5737 |
| 17 | 0.8262 | 0.6464 | 0.6049 | 0.9118 | 0.7903 | 0.7318 |
| 18 | 0.7306 | 0.5764 | 0.4818 | 0.8663 | 0.7618 | 0.6511 |
| 19 | 0.9432 | 0.8777 | 0.8807 | 0.9809 | 0.9119 | 0.8982 |
| 20 | 0.658  | 0.5529 | 0.5104 | 0.8032 | 0.7283 | 0.6522 |
| 21 | 0.5313 | 0.4043 | 0.3338 | 0.7085 | 0.6582 | 0.5764 |
| 22 | 0.6423 | 0.3879 | 0.3738 | 0.79   | 0.6428 | 0.5696 |
| 23 | 0.9707 | 0.931  | 0.9318 | 0.9831 | 0.9687 | 0.9594 |
| 24 | 0.6368 | 0.4946 | 0.4156 | 0.7993 | 0.7019 | 0.6277 |
| 25 | 0.8566 | 0.7437 | 0.6826 | 0.9526 | 0.8567 | 0.8248 |
| 26 | 0.8341 | 0.75   | 0.7179 | 0.9175 | 0.8347 | 0.7851 |
| 27 | 0.6034 | 0.4358 | 0.2714 | 0.7695 | 0.6645 | 0.5469 |
| 28 | 0.794  | 0.6011 | 0.5001 | 0.8868 | 0.7615 | 0.6411 |
| 29 | 0.6407 | 0.5168 | 0.5377 | 0.7367 | 0.6885 | 0.6732 |
| 30 | 0.6256 | 0.5448 | 0.4793 | 0.7684 | 0.7561 | 0.6456 |
| 31 | 0.7224 | 0.5635 | 0.4884 | 0.8387 | 0.7602 | 0.6612 |
| 32 | 0.7818 | 0.6716 | 0.6492 | 0.866  | 0.8119 | 0.8    |
| 33 | 0.8857 | 0.9162 | 0.8537 | 0.9268 | 0.9439 | 0.8911 |
| 34 | 0.6181 | 0.63   | 0.6026 | 0.7601 | 0.7724 | 0.733  |
| 35 | 0.7877 | 0.7774 | 0.709  | 0.9006 | 0.8627 | 0.7897 |
| 36 | 0.634  | 0.4776 | 0.4347 | 0.7366 | 0.6573 | 0.619  |
| 37 | 0.704  | 0.5841 | 0.5473 | 0.8154 | 0.7881 | 0.7318 |
| 38 | 0.9437 | 0.8817 | 0.8091 | 0.9831 | 0.9373 | 0.8937 |
| 39 | 0.4746 | 0.3651 | 0.3126 | 0.7409 | 0.6053 | 0.5864 |
| 40 | 0.4982 | 0.3684 | 0.3845 | 0.6824 | 0.6112 | 0.5876 |
| 41 | 0.5939 | 0.4343 | 0.3497 | 0.7707 | 0.6912 | 0.5997 |
| 42 | 0.645  | 0.4161 | 0.4199 | 0.7385 | 0.6932 | 0.6795 |
| 43 | 0.9859 | 0.9578 | 0.9359 | 1      | 0.9618 | 0.9408 |
| 44 | 0.7348 | 0.6607 | 0.5502 | 0.8327 | 0.7719 | 0.6957 |
| 45 | 0.7662 | 0.7447 | 0.6907 | 0.8823 | 0.8448 | 0.797  |
| 46 | 0.639  | 0.5344 | 0.5032 | 0.7442 | 0.6708 | 0.6812 |
| 47 | 0.6066 | 0.3829 | 0.308  | 0.7536 | 0.6437 | 0.5617 |
| 48 | 0.7316 | 0.6177 | 0.475  | 0.8578 | 0.7862 | 0.6771 |
| 49 | 0.899  | 0.876  | 0.7397 | 0.939  | 0.9258 | 0.8414 |
| 50 | 0.8435 | 0.679  | 0.6219 | 0.931  | 0.8085 | 0.7816 |
| 51 | 0.69   | 0.5185 | 0.5211 | 0.789  | 0.6689 | 0.612  |
| 52 | 0.8075 | 0.8418 | 0.7788 | 0.865  | 0.8961 | 0.8316 |
| 53 | 0.7651 | 0.6594 | 0.6386 | 0.8759 | 0.7755 | 0.7155 |
| 54 | 0.716  | 0.5515 | 0.5552 | 0.8289 | 0.7569 | 0.7306 |
| 55 | 0.4347 | 0.4631 | 0.4897 | 0.6372 | 0.6374 | 0.6    |
| 56 | 0.7239 | 0.5255 | 0.521  | 0.8439 | 0.705  | 0.6808 |
| 57 | 0.5103 | 0.471  | 0.3545 | 0.7133 | 0.6411 | 0.561  |
| 58 | 0.6651 | 0.5925 | 0.4565 | 0.8433 | 0.715  | 0.6411 |
| 59 | 0.5975 | 0.7093 | 0.5989 | 0.7285 | 0.8251 | 0.7438 |

|    |        |        |        |        |        |        |
|----|--------|--------|--------|--------|--------|--------|
| 60 | 0.5415 | 0.5197 | 0.383  | 0.7155 | 0.6603 | 0.5582 |
| 61 | 0.555  | 0.6064 | 0.5101 | 0.7165 | 0.7233 | 0.6516 |
| 62 | 0.3357 | 0.4899 | 0.1926 | 0.6128 | 0.6146 | 0.5048 |
| 63 | 0.4432 | 0.3226 | 0.3321 | 0.6684 | 0.6042 | 0.5845 |
| 64 | 0.7702 | 0.7025 | 0.6597 | 0.8084 | 0.8518 | 0.7629 |
| 65 | 0.8131 | 0.7259 | 0.6291 | 0.8807 | 0.8387 | 0.7016 |
| 66 | 0.362  | 0.4223 | 0.251  | 0.6524 | 0.5911 | 0.5155 |
| 67 | 0.6656 | 0.3825 | 0.4207 | 0.7321 | 0.579  | 0.5812 |
| 68 | 0.6324 | 0.3591 | 0.2973 | 0.7323 | 0.6846 | 0.665  |
| 69 | 0.6138 | 0.5709 | 0.4051 | 0.706  | 0.6849 | 0.5365 |
| 70 | 0.6308 | 0.5712 | 0.5069 | 0.7131 | 0.7011 | 0.6277 |
| 71 | 0.4837 | 0.3517 | 0.2592 | 0.6923 | 0.5896 | 0.5299 |
| 72 | 0.7941 | 0.4715 | 0.4116 | 0.8668 | 0.6629 | 0.6011 |
| 73 | 0.2006 | 0.1185 | 0.1032 | 0.5565 | 0.5211 | 0.503  |
| 74 | 0.4953 | 0.607  | 0.4648 | 0.7279 | 0.7006 | 0.5556 |
| 75 | 0.7036 | 0.9636 | 0.9403 | 0.75   | 0.9937 | 0.9873 |
| 76 | 0.781  | 0.6333 | 0.5557 | 0.8277 | 0.7187 | 0.6111 |
| 77 | 0.5007 | 0.7286 | 0.3398 | 0.7058 | 0.8007 | 0.6521 |
| 78 | 0.7429 | 0.563  | 0.3976 | 0.75   | 0.7464 | 0.6607 |
| 79 | 0.7034 | 0.7177 | 0.6838 | 0.7461 | 0.7254 | 0.7007 |
| 80 | 0.5823 | 0.5262 | 0.4874 | 0.7276 | 0.6969 | 0.6704 |
| 81 | 0.6851 | 0.7621 | 0.6851 | 0.7351 | 0.8577 | 0.8077 |
| 82 | 0.6132 | 0.7282 | 0.3972 | 0.7187 | 0.761  | 0.5221 |
| 83 | 0.4122 | 0.3958 | 0.1755 | 0.6591 | 0.6009 | 0.5088 |
| 84 | 0.489  | 0.4406 | 0.3469 | 0.7089 | 0.6567 | 0.5634 |
| 85 | 0.6578 | 0.6474 | 0.579  | 0.7192 | 0.6865 | 0.623  |
| 86 | 0.7628 | 0.6712 | 0.5166 | 0.8437 | 0.7615 | 0.6807 |
| 87 | 0.6924 | 0.5887 | 0.4925 | 0.7333 | 0.7386 | 0.6591 |
| 88 | 0.4828 | 0.4332 | 0.363  | 0.7031 | 0.6975 | 0.5726 |
| 89 | 0.7095 | 0.5677 | 0.4047 | 0.7417 | 0.7155 | 0.6379 |
| 90 | 0.7147 | 0.4721 | 0.5247 | 0.8016 | 0.6352 | 0.5246 |
| 91 | 0.6503 | 0.6096 | 0.434  | 0.77   | 0.6864 | 0.5339 |
| 92 | 0.693  | 0.8516 | 0.5245 | 0.8088 | 0.9216 | 0.7353 |
| 93 | 0.7073 | 0.4923 | 0.4651 | 0.8235 | 0.6765 | 0.6029 |
| 94 | 0.4779 | 0.6508 | 0.2921 | 0.6887 | 0.7674 | 0.5698 |
| 95 | 0.8358 | 0.0003 | 0.5003 | 0.8586 | 0.5    | 0.5    |
| 96 | 0.5972 | 0.3337 | 0.3751 | 0.6902 | 0.6722 | 0.65   |
| 97 | 0.5489 | 0.6806 | 0.6006 | 0.6988 | 0.7394 | 0.6489 |
| 98 | 0.7038 | 0.6158 | 0.4199 | 0.8562 | 0.6375 | 0.5937 |
| 99 | 0.6506 | 0.5063 | 0.4637 | 0.7375 | 0.6687 | 0.6    |

**Table S5.** The performance of MSED DI variants on Dataset1

| Method           | Task1         |               |               |               | Task2         |               |               |               |
|------------------|---------------|---------------|---------------|---------------|---------------|---------------|---------------|---------------|
|                  | ACC           | AUPR          | AUC           | F1            | ACC           | AUPR          | AUC           | F1            |
| MSED DI_NC       | 0.6281        | 0.6676        | <b>0.9842</b> | 0.4218        | 0.4192        | 0.3925        | <b>0.9620</b> | 0.1310        |
| MSED DI_SC       | 0.5152        | 0.5118        | 0.9682        | 0.2661        | 0.2843        | 0.2203        | 0.9256        | 0.0540        |
| MSED DI_GC       | 0.5008        | 0.4983        | 0.9630        | 0.2039        | 0.3115        | 0.2563        | 0.9221        | 0.0734        |
| MSED DI_NO_ADD   | 0.6428        | 0.6765        | 0.9819        | 0.4765        | 0.4262        | 0.3881        | 0.9529        | 0.1546        |
| MSED DI_NO_CONV  | 0.6328        | 0.6670        | 0.9816        | 0.4732        | 0.4089        | 0.3728        | 0.9528        | 0.1585        |
| MSED DI_NO_ATTEN | 0.6112        | 0.6347        | 0.9805        | 0.3711        | 0.3993        | 0.3432        | 0.9488        | 0.0908        |
| <b>MSED DI</b>   | <b>0.6517</b> | <b>0.6810</b> | 0.9823        | <b>0.4771</b> | <b>0.4451</b> | <b>0.3999</b> | 0.9543        | <b>0.1691</b> |

The best results are highlighted in boldface.

**Table S6.** The performance of MSED DI variants on Dataset2

| Method           | Task1         |               |               |               | Task2         |               |               |               |
|------------------|---------------|---------------|---------------|---------------|---------------|---------------|---------------|---------------|
|                  | ACC           | AUPR          | AUC           | F1            | ACC           | AUPR          | AUC           | F1            |
| MSED DI_NC       | 0.7245        | 0.7873        | 0.9938        | 0.5778        | 0.6062        | 0.6369        | 0.9863        | 0.2869        |
| MSED DI_SC       | 0.5442        | 0.5573        | 0.9831        | 0.3936        | 0.3082        | 0.2314        | 0.9391        | 0.0933        |
| MSED DI_GC       | 0.5383        | 0.5451        | 0.9817        | 0.3939        | 0.3556        | 0.2966        | 0.9530        | 0.1577        |
| MSED DI_NO_ADD   | <b>0.7698</b> | <b>0.8317</b> | 0.9947        | 0.6419        | <b>0.6316</b> | <b>0.6632</b> | 0.9865        | 0.3058        |
| MSED DI_NO_CONV  | 0.7659        | 0.8288        | <b>0.9948</b> | 0.6350        | 0.6248        | 0.6557        | <b>0.9865</b> | 0.3011        |
| MSED DI_NO_ATTEN | 0.7512        | 0.8130        | 0.9943        | 0.6138        | 0.6046        | 0.6276        | 0.9848        | 0.2780        |
| <b>MSED DI</b>   | 0.7697        | 0.8315        | 0.9947        | <b>0.6486</b> | 0.6309        | 0.6596        | 0.9863        | <b>0.3111</b> |

The best results are highlighted in boldface.

**Table S7.** MSED DI predictions for DDI events unknown in Dataset

| Drug1         | Drug2           | Event                   | Label   |         |
|---------------|-----------------|-------------------------|---------|---------|
| Lapatinib     | Mestranol       | The metabolism decrease | Event#0 |         |
| Nabiximols    | Losartan        | The metabolism decrease | Event#0 | reverse |
| Brivaracetam  | Midostaurin     | The metabolism decrease | Event#0 | reverse |
| Midostaurin   | Methoxyflurane  | The metabolism decrease | Event#0 | reverse |
| Nateglinide   | Mexiletine      | The metabolism decrease | Event#0 |         |
| Brivaracetam  | Imatinib        | The metabolism decrease | Event#0 | reverse |
| Brivaracetam  | Lobeglitazone   | The metabolism decrease | Event#0 | reverse |
| Lobeglitazone | Ketamine        | The metabolism decrease | Event#0 | reverse |
| Enasidenib    | Lorcaserin      | The metabolism decrease | Event#0 | reverse |
| Arformoterol  | Cholecalciferol | The metabolism decrease | Event#0 | reverse |
| Brivaracetam  | Bortezomib      | The metabolism decrease | Event#0 | reverse |
| Donepezil     | Cholecalciferol | The metabolism decrease | Event#0 | reverse |



|                 |                    |                                                  |         |         |
|-----------------|--------------------|--------------------------------------------------|---------|---------|
| Cholecalciferol | Cevimeline         | The metabolism decrease                          | Event#0 | reverse |
| Encainide       | Cholecalciferol    | The metabolism decrease                          | Event#0 | reverse |
| Ethylmorphine   | Cholecalciferol    | The metabolism decrease                          | Event#0 | reverse |
| Cholecalciferol | Antipyrine         | The metabolism decrease                          | Event#0 | reverse |
| Cholecalciferol | Methoxyflurane     | The metabolism decrease                          | Event#0 | reverse |
| Enasidenib      | Cholecalciferol    | The metabolism decrease                          | Event#0 | reverse |
| Mesoridazine    | Fospropofol        | The risk or severity of adverse effects increase | Event#1 | reverse |
| Brompheniramine | Fospropofol        | The risk or severity of adverse effects increase | Event#1 | reverse |
| Meprobamate     | Dextropropoxyphene | The risk or severity of adverse effects increase | Event#1 | reverse |
| Mesoridazine    | Meprobamate        | The risk or severity of adverse effects increase | Event#1 | reverse |
| Hydromorphone   | Meclizine          | The risk or severity of adverse effects increase | Event#1 | reverse |
| Meprobamate     | Lurasidone         | The risk or severity of adverse effects increase | Event#1 | reverse |
| Hydromorphone   | Ketazolam          | The risk or severity of adverse effects increase | Event#1 | reverse |
| Fospropofol     | Almotriptan        | The risk or severity of adverse effects increase | Event#1 |         |
| Almotriptan     | Fospropofol        | The risk or severity of adverse effects increase | Event#1 |         |
| Meclizine       | Ketazolam          | The risk or severity of adverse effects increase | Event#1 | reverse |
| Meprobamate     | Dantrolene         | The risk or severity of adverse effects increase | Event#1 | reverse |
| Meprobamate     | Ezogabine          | The risk or severity of adverse effects increase | Event#1 | reverse |
| Methsuximide    | Meprobamate        | The risk or severity of adverse effects increase | Event#1 | reverse |

|               |               |                                                   |          |         |
|---------------|---------------|---------------------------------------------------|----------|---------|
| Morphine      | Ketazolam     | The risk or severity of adverse effects increase  | Event#1  | reverse |
| Meprobamate   | Meclizine     | The risk or severity of adverse effects increase  | Event#1  | reverse |
| Meprobamate   | Glutethimide  | The risk or severity of adverse effects increase  | Event#1  | reverse |
| Meprobamate   | Fospropofol   | The risk or severity of adverse effects increase  | Event#1  | reverse |
| Meprobamate   | Melperone     | The risk or severity of adverse effects increase  | Event#1  | reverse |
| Meprobamate   | Ketazolam     | The risk or severity of adverse effects increase  | Event#1  | reverse |
| Carbamazepine | Naproxen      | The metabolism increase                           | Event#8  | reverse |
| Fosphenytoin  | Fenofibrate   | The metabolism increase                           | Event#8  | reverse |
| Carbamazepine | Antipyrine    | The metabolism increase                           | Event#8  | reverse |
| Acetaminophen | Amobarbital   | The metabolism increase                           | Event#8  | reverse |
| Clofibrate    | Carbamazepine | The metabolism increase                           | Event#8  | reverse |
| Fenofibrate   | Carbamazepine | The metabolism increase                           | Event#8  | reverse |
| Iloperidone   | Domperidone   | The risk or severity of QTc prolongation increase | Event#24 | reverse |
| Cisapride     | Anagrelide    | The risk or severity of QTc prolongation increase | Event#24 | reverse |
| Citalopram    | Asenapine     | The risk or severity of QTc prolongation increase | Event#24 | reverse |
| Iloperidone   | Disopyramide  | The risk or severity of QTc prolongation increase | Event#24 | reverse |
| Domperidone   | Citalopram    | The risk or severity of QTc prolongation increase | Event#24 | reverse |
| Cisapride     | Asenapine     | The risk or severity of QTc                       | Event#24 | reverse |

|                  |                |                                                            |          |         |
|------------------|----------------|------------------------------------------------------------|----------|---------|
|                  |                | prolongation<br>increase                                   |          |         |
| Flupentixol      | Cisapride      | The risk or severity<br>of QTc<br>prolongation<br>increase | Event#24 | reverse |
| Fluoxetine       | Disopyramide   | The risk or severity<br>of QTc<br>prolongation<br>increase | Event#24 | reverse |
| Escitalopram     | Disopyramide   | The risk or severity<br>of QTc<br>prolongation<br>increase | Event#24 | reverse |
| Disopyramide     | Citalopram     | The risk or severity<br>of QTc<br>prolongation<br>increase | Event#24 | reverse |
| Domperidone      | Asenapine      | The risk or severity<br>of QTc<br>prolongation<br>increase | Event#24 | reverse |
| Flupentixol      | Eliglustat     | The risk or severity<br>of QTc<br>prolongation<br>increase | Event#24 | reverse |
| Citalopram       | Flupentixol    | The risk or severity<br>of QTc<br>prolongation<br>increase | Event#24 | reverse |
| Etonogestrel     | Acetohexamide  | The therapeutic<br>efficacy decrease                       | Event#4  | reverse |
| Ethinylestradiol | Glimepiride    | The therapeutic<br>efficacy decrease                       | Event#4  | reverse |
| Levonorgestrel   | Glyburide      | The therapeutic<br>efficacy decrease                       | Event#4  | reverse |
| Donepezil        | Cyclopentolate | The therapeutic<br>efficacy decrease                       | Event#4  | reverse |
| Mestranol        | Glimepiride    | The therapeutic<br>efficacy decrease                       | Event#4  | reverse |
| Levonorgestrel   | Glipizide      | The therapeutic<br>efficacy decrease                       | Event#4  | reverse |
| Estradiol        | Glimepiride    | The therapeutic<br>efficacy decrease                       | Event#4  | reverse |
| Gestodene        | Glipizide      | The therapeutic<br>efficacy decrease                       | Event#4  |         |
| Gestodene        | Acetohexamide  | The therapeutic<br>efficacy decrease                       | Event#4  |         |
| Gestodene        | Chlorpropamide | The therapeutic<br>efficacy decrease                       | Event#4  |         |
| Etonogestrel     | Gliclazide     | The therapeutic<br>efficacy decrease                       | Event#4  | reverse |

|                |                |                                   |         |         |
|----------------|----------------|-----------------------------------|---------|---------|
| Mitiglinide    | Levonorgestrel | The therapeutic efficacy decrease | Event#4 | reverse |
| Levonorgestrel | Glimepiride    | The therapeutic efficacy decrease | Event#4 | reverse |
| Gestodene      | Glyburide      | The therapeutic efficacy decrease | Event#4 |         |
| Gestodene      | Gliclazide     | The therapeutic efficacy decrease | Event#4 |         |
| Levonorgestrel | Acetohexamide  | The therapeutic efficacy decrease | Event#4 | reverse |
| Gestodene      | Glimepiride    | The therapeutic efficacy decrease | Event#4 |         |
| Levonorgestrel | Gliclazide     | The therapeutic efficacy decrease | Event#4 | reverse |

The “reverse” means the corresponding reverse-order drug-drug pair (DDI) exists in the training set.

**Table S8.** All DDI event profiles for Database1

| Event                                                                      | Label |
|----------------------------------------------------------------------------|-------|
| The metabolism decrease                                                    | 0     |
| The risk or severity of adverse effects increase                           | 1     |
| The serum concentration increase                                           | 2     |
| The serum concentration decrease                                           | 3     |
| The therapeutic efficacy decrease                                          | 4     |
| the central nervous system depressant (CNS depressant) activities increase | 5     |
| the QTc - prolonging activities increase                                   | 6     |
| the hypotensive activities increase                                        | 7     |
| The metabolism increase                                                    | 8     |
| the antihypertensive activities decrease                                   | 9     |
| the hypoglycemic activities increase                                       | 10    |
| the anticoagulant activities increase                                      | 11    |
| The serum concentration of the active metabolites increase                 | 12    |
| the bradycardic activities increase                                        | 13    |
| the serotonergic activities increase                                       | 14    |
| The therapeutic efficacy increase                                          | 15    |
| the hypokalemic activities increase                                        | 16    |
| the orthostatic hypotensive activities increase                            | 17    |
| the cardiotoxic activities decrease                                        | 18    |
| the excretion rate which could result in a higher serum level decrease     | 19    |
| the atrioventricular blocking ( AV block ) activities increase             | 20    |
| the sedative activities decrease                                           | 21    |
| the tachycardic activities increase                                        | 22    |
| the hypertensive and vasoconstricting activities increase                  | 23    |
| The risk or severity of QTc prolongation increase                          | 24    |
| the antihypertensive activities increase                                   | 25    |
| the arrhythmogenic activities increase                                     | 26    |
| the cardiotoxic activities increase                                        | 27    |

|                                                                                                                                  |    |
|----------------------------------------------------------------------------------------------------------------------------------|----|
| The risk or severity of hypotension increase                                                                                     | 28 |
| the bronchodilatory activities decrease                                                                                          | 29 |
| the hyperkalemic activities increase                                                                                             | 30 |
| the nephrotoxic activities increase                                                                                              | 31 |
| the hypertensive activities increase                                                                                             | 32 |
| the vasoconstricting activities increase                                                                                         | 33 |
| the neuroexcitatory activities increase                                                                                          | 34 |
| the anticoagulant activities decrease                                                                                            | 35 |
| the fluid increase                                                                                                               | 36 |
| the antiplatelet activities increase                                                                                             | 37 |
| The serum concentration of the active metabolites reduce                                                                         | 38 |
| the immunosuppressive activities increase                                                                                        | 39 |
| The risk or severity of bleeding increase                                                                                        | 40 |
| the stimulatory activities decrease                                                                                              | 41 |
| the vasoconstricting activities decrease                                                                                         | 42 |
| The risk or severity of myelosuppression increase                                                                                | 43 |
| the thrombogenic activities increase                                                                                             | 44 |
| the anticholinergic activities increase                                                                                          | 45 |
| the analgesic activities increase                                                                                                | 46 |
| an increase in the absorption resulting in an increased serum concentration and potentially a worsening of adverse effects cause | 47 |
| The risk or severity of sedation and somnolence increase                                                                         | 48 |
| The risk or severity of rhabdomyolysis increase                                                                                  | 49 |
| The risk or severity of hyperkalemia increase                                                                                    | 50 |
| the hepatotoxic activities increase                                                                                              | 51 |
| the respiratory depressant activities increase                                                                                   | 52 |
| the myopathic rhabdomyolysis activities increase                                                                                 | 53 |
| the vasopressor activities increase                                                                                              | 54 |
| a decrease in the absorption resulting in a reduced serum concentration and potentially a decrease in efficacy cause             | 55 |
| the hyponatremic activities increase                                                                                             | 56 |
| the excretion rate which could result in a lower serum level and potentially a reduction in efficacy increase                    | 57 |
| The risk or severity of myopathy and rhabdomyolysis increase                                                                     | 58 |
| the neuromuscular blocking activities decrease                                                                                   | 59 |
| The risk of a hypersensitivity reaction increase                                                                                 | 60 |
| the hypocalcemic activities increase                                                                                             | 61 |
| the vasodilatory activities increase                                                                                             | 62 |
| the myelosuppressive activities increase                                                                                         | 63 |
| the hyperglycemic activities increase                                                                                            | 64 |

**Table S9.** All DDI event profiles for Database2

| Event                   | Label |
|-------------------------|-------|
| The metabolism decrease | 0     |

|                                                                                                                      |    |
|----------------------------------------------------------------------------------------------------------------------|----|
| the excretion rate which could result in a higher serum level decrease                                               | 1  |
| The risk or severity of adverse effects increase                                                                     | 2  |
| The metabolism increase                                                                                              | 3  |
| The serum concentration increase                                                                                     | 4  |
| The risk or severity of QTc prolongation increase                                                                    | 5  |
| The therapeutic efficacy decrease                                                                                    | 6  |
| the central nervous system depressant (CNS depressant) activities increase                                           | 7  |
| the antihypertensive activities decrease                                                                             | 8  |
| The risk or severity of hypertension increase                                                                        | 9  |
| the excretion rate which could result in a lower serum level and potentially a reduction in efficacy increase        | 10 |
| The serum concentration decrease                                                                                     | 11 |
| The therapeutic efficacy increase                                                                                    | 12 |
| the hypotensive activities increase                                                                                  | 13 |
| the arrhythmogenic activities increase                                                                               | 14 |
| The risk or severity of hyperkalemia increase                                                                        | 15 |
| The excretion decrease                                                                                               | 16 |
| The risk or severity of hypoglycemia increase                                                                        | 17 |
| The risk or severity of bleeding increase                                                                            | 18 |
| The risk or severity of hyperglycemia increase                                                                       | 19 |
| the bradycardic activities increase                                                                                  | 20 |
| The risk or severity of serotonin syndrome increase                                                                  | 21 |
| The risk or severity of myopathy rhabdomyolysis and myoglobinuria increase                                           | 22 |
| The risk or severity of gastrointestinal irritation increase                                                         | 23 |
| The risk or severity of hypotension increase                                                                         | 24 |
| The risk or severity of bradycardia increase                                                                         | 25 |
| The risk or severity of bleeding and hemorrhage increase                                                             | 26 |
| the orthostatic hypotensive activities increase                                                                      | 27 |
| the hypoglycemic activities increase                                                                                 | 28 |
| The risk or severity of CNS depression increase                                                                      | 29 |
| a decrease in the absorption resulting in a reduced serum concentration and potentially a decrease in efficacy cause | 30 |
| The risk or severity of Tachycardia increase                                                                         | 31 |
| The risk or severity of gastrointestinal bleeding increase                                                           | 32 |
| The risk or severity of renal failure hyperkalemia and hypertension increase                                         | 33 |
| the antihypertensive activities increase                                                                             | 34 |
| The risk or severity of hypokalemia increase                                                                         | 35 |
| the immunosuppressive activities increase                                                                            | 36 |
| the neuromuscular blocking activities increase                                                                       | 37 |
| the neuroexcitatory activities increase                                                                              | 38 |
| the orthostatic hypotensive hypotensive and antihypertensive activities increase                                     | 39 |
| the QTcprolonging activities increase                                                                                | 40 |
| the serotonergic activities increase                                                                                 | 41 |
| The risk or severity of sedation increase                                                                            | 42 |

|                                                                          |    |
|--------------------------------------------------------------------------|----|
| The risk or severity of tendinopathy increase                            | 43 |
| the anticoagulant activities increase                                    | 44 |
| the hypertensive and vasoconstricting activities increase                | 45 |
| the sedative activities increase                                         | 46 |
| the hypertensive activities increase                                     | 47 |
| the vasoconstricting activities increase                                 | 48 |
| The protein binding decrease                                             | 49 |
| the anticoagulant activities decrease                                    | 50 |
| the neurotoxic activities increase                                       | 51 |
| The risk or severity of edema formation increase                         | 52 |
| the hypoglycemic activities decrease                                     | 53 |
| the vasodilatory activities increase                                     | 54 |
| The risk or severity of methemoglobinemia increase                       | 55 |
| The risk or severity of hemorrhage increase                              | 56 |
| The risk or severity of nephrotoxicity increase                          | 57 |
| the sedative and stimulatory activities decrease                         | 58 |
| the nephrotoxic activities increase                                      | 59 |
| the anticholinergic activities increase                                  | 60 |
| The risk or severity of hypotension dyspepsia and headache increase      | 61 |
| the hepatotoxic activities increase                                      | 62 |
| The risk or severity of seizure increase                                 | 63 |
| the tachycardic activities increase                                      | 64 |
| the bronchodilatory activities decrease                                  | 65 |
| the antiplatelet activities increase                                     | 66 |
| The risk or severity of myelosuppression increase                        | 67 |
| The risk or severity of hypotension and orthostatic hypotension increase | 68 |
| The risk or severity of Cardiac Arrhythmia increase                      | 69 |
| the hyperkalemic activities increase                                     | 70 |
| The risk or severity of orthostatic hypotension and syncope increase     | 71 |
| the analgesic activities increase                                        | 72 |
| The risk or severity of liver damage increase                            | 73 |
| The risk or severity of extrapyramidal symptoms increase                 | 74 |
| The risk or severity of electrolyte imbalance increase                   | 75 |
| the thrombogenic activities increase                                     | 76 |
| The risk or severity of sedation and somnolence increase                 | 77 |
| The risk or severity of myopathy and weakness increase                   | 78 |
| The risk or severity of renal failure and hypertension increase          | 79 |
| The risk or severity of hypertension decrease                            | 80 |
| The risk or severity of neutropenia and thrombocytopenia increase        | 81 |
| The risk or severity of Tachycardia and drowsiness increase              | 82 |
| The risk or severity of neutropenia increase                             | 83 |
| the stimulatory activities decrease                                      | 84 |
| The risk or severity of renal failure increase                           | 85 |
| The risk or severity of fluid retention increase                         | 86 |

|                                                                                                                                     |    |
|-------------------------------------------------------------------------------------------------------------------------------------|----|
| The risk or severity of hyponatremia increase                                                                                       | 87 |
| the vasopressor activities increase                                                                                                 | 88 |
| The risk or severity of QTc prolongation decrease                                                                                   | 89 |
| The risk or severity of hypotension and CNS depression increase                                                                     | 90 |
| an increase in the absorption resulting in an increased serum concentration and<br>potentially a worsening of adverse effects cause | 91 |
| The risk or severity of renal failure hypotension and hyperkalemia increase                                                         | 92 |
| The risk or severity of QTc prolongation and hypotension increase                                                                   | 93 |
| The risk or severity of angioedema increase                                                                                         | 94 |
| The serum concentration of the active metabolites increase                                                                          | 95 |
| The absorption decrease                                                                                                             | 96 |
| the hypokalemic activities increase                                                                                                 | 97 |
| the neuromuscular blocking activities decrease                                                                                      | 98 |
| The risk or severity of hyperthermia and oligohydrosis increase                                                                     | 99 |
